# Supplementary material
Source: PubMed Central journal article supplement (PMC5033885)
Supplement: jciinsight-1-85461-s001.pdf [file jciinsight-1-85461-s001.pdf]

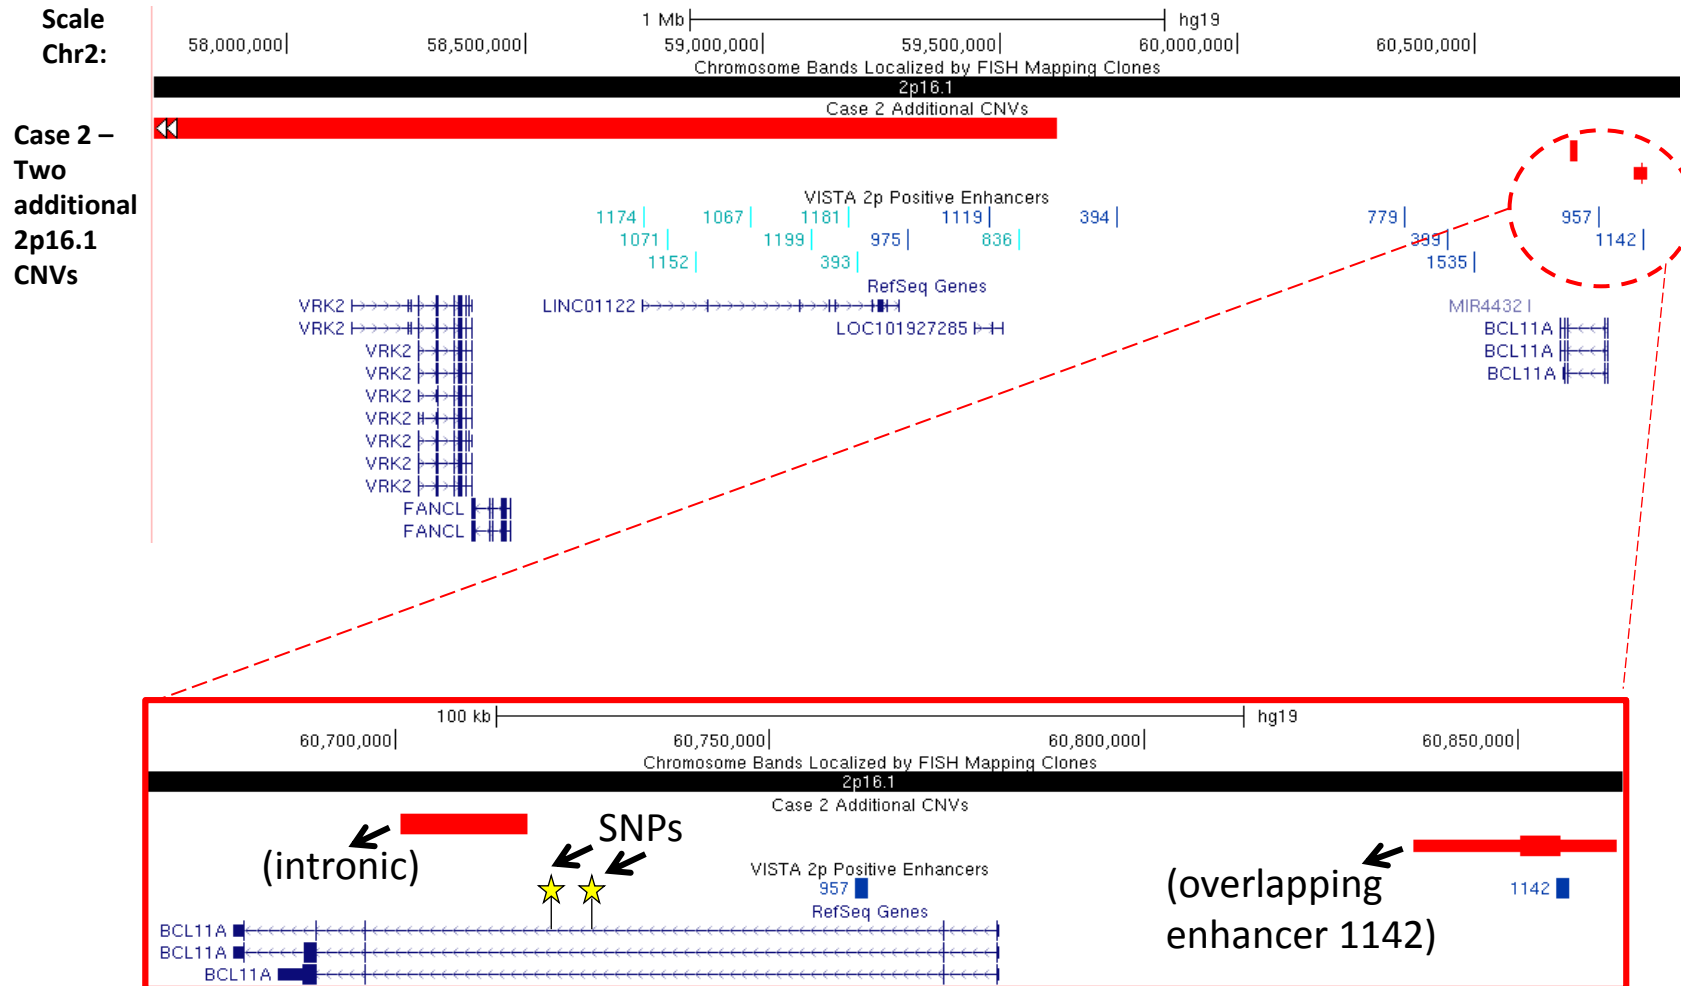

**Supplemental Figure 1 – Three CNVs from 2p15p16.1 in case 2.**

Case 2 had three 2p15p16.1 deletions: One large (~2Mb) and two additional smaller CNVs (~17Kb and ~27Kb). The red bars indicate the deletions. The detailed breakpoint junctions and positions of the two small CNVs (encircled) in relation to the large CNV are shown on the diagram: One CNV lied within the second intron of *BCL11A* (60700679-60717669) and adjacent to two *BCL11A* SNPs (indicated with yellow stars), rs1427407 (at 60,718,043) and rs75994488 (60,718,097-60,718,597), associated with fetal hemoglobin expression and neurodevelopment, respectively. The extent of the second CNV was refined with QMPSF (60828557-60855688) to show that it overlaps with enhancer 1142 which has a high expression in the hindbrain of the mouse (as reported by VISTA).

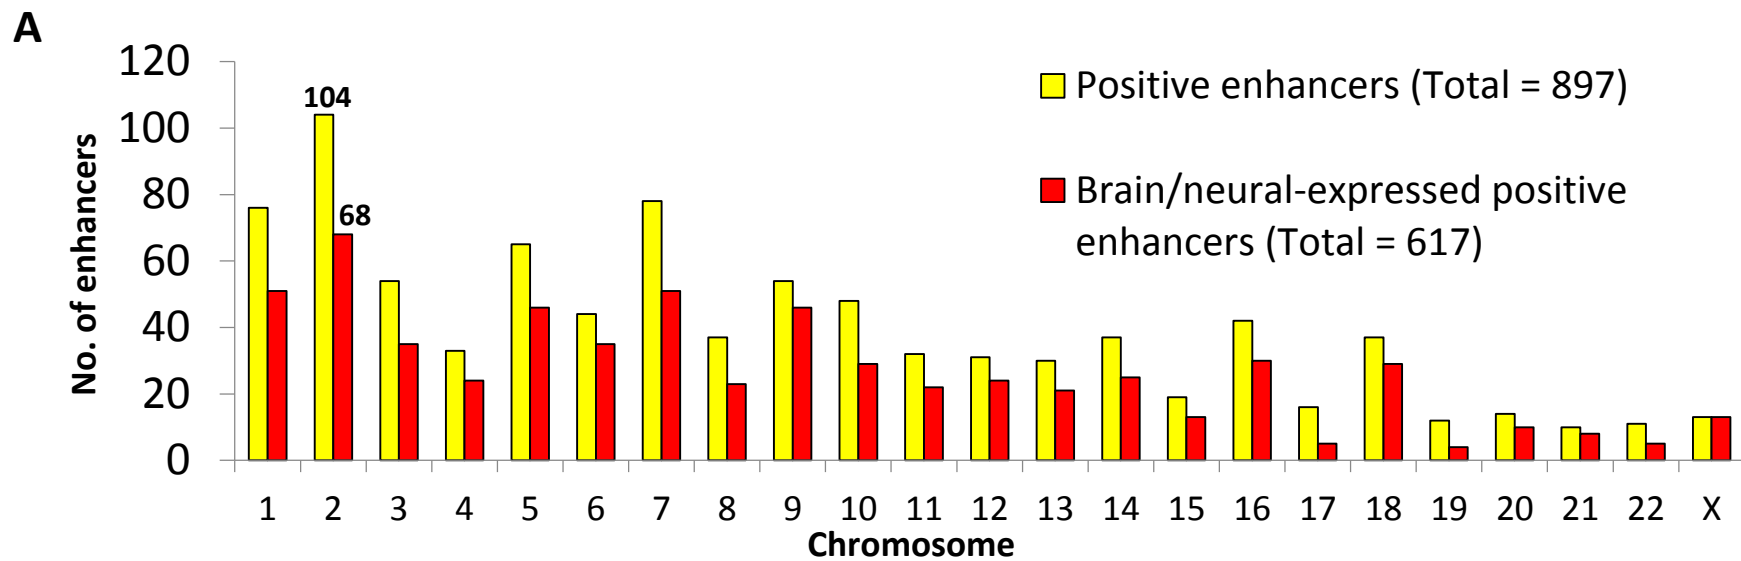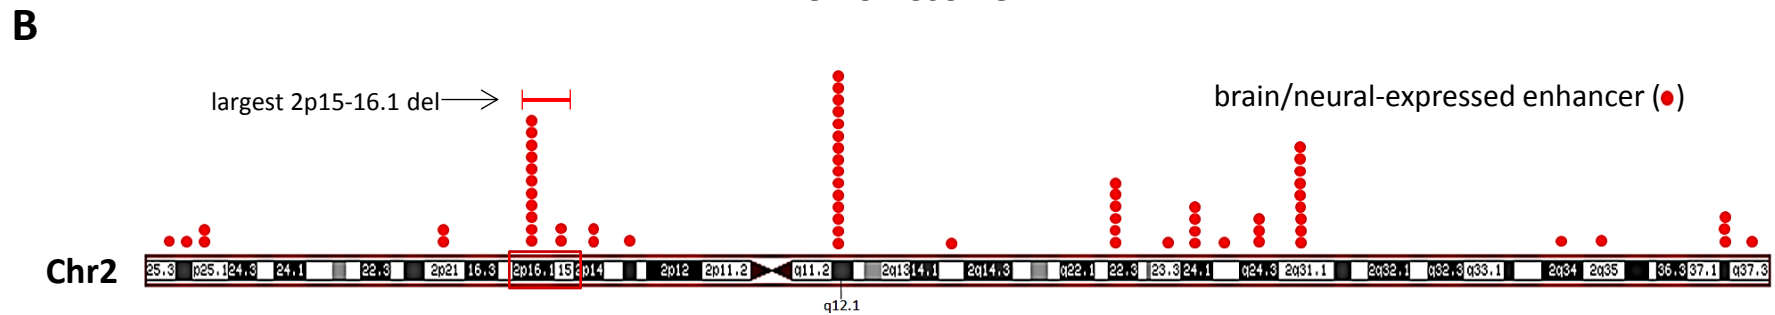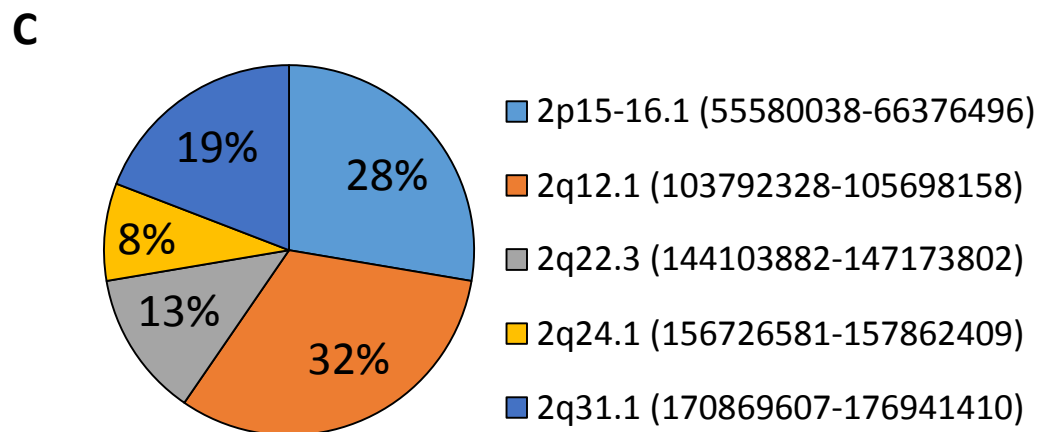

**Supplemental Figure 2 – Distribution of enhancers among human chromosomes.** A) Distribution of the total of 897 enhancers per chromosome. 104 positive enhancers and 68 brain/neural-expressed enhancers are on chromosome 2. B) Distribution of all 68 brain/neural-expressed enhancers on chromosome 2 cytotbands. The largest 2p15p16.1 deletion which was found in our newly recruited case 1 (chr2:55676099-65250541, hg19) is shown with a red scale-bar which covers all the 13 enhancers in that region distributed in chr2:58748340-63277103). C) The percentage enrichment of top 5 enriched chromosome 2 cytotbands with brain/neural-expressed enhancers. The top 5 enriched cytotbands were identified based on if they harbored at least 4 brain/neural-expressed enhancers. Almost a third of brain/neural-expressed enhancers on chromosome 2 are enriched at 2p15p16.1.

A

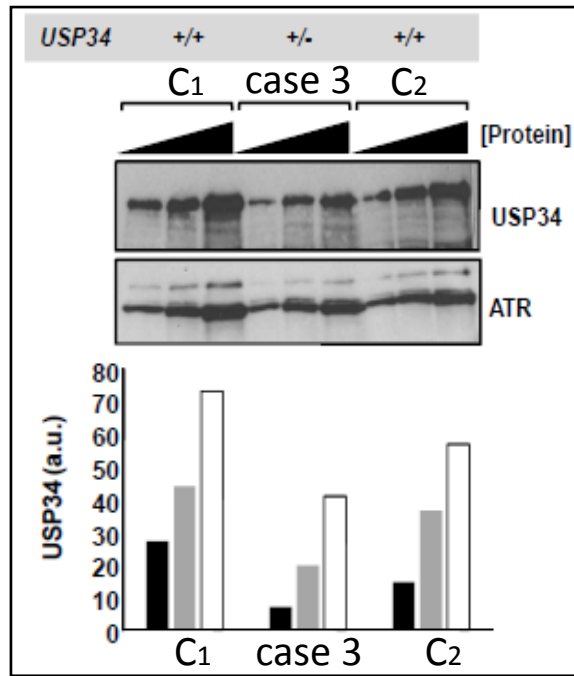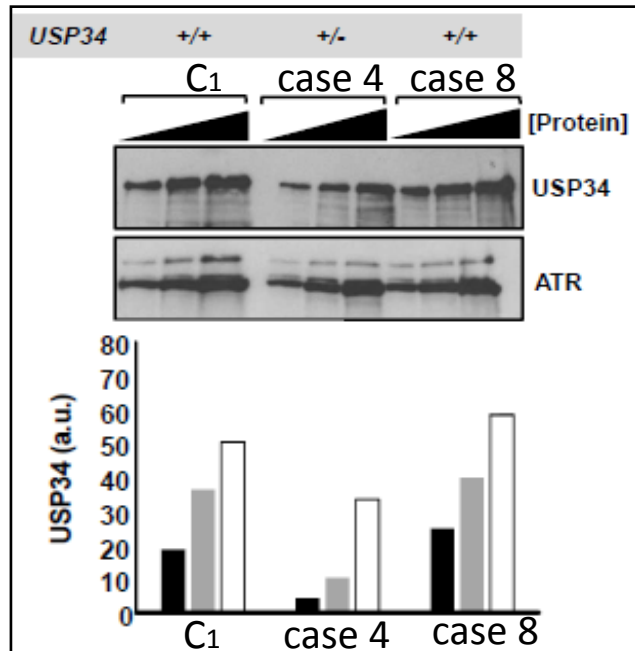

B

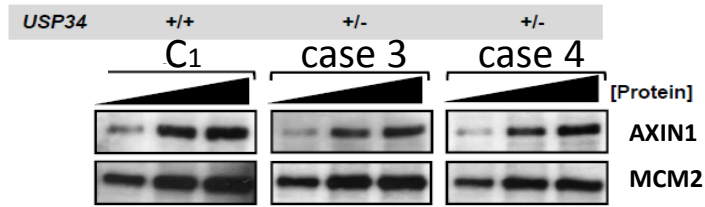

C

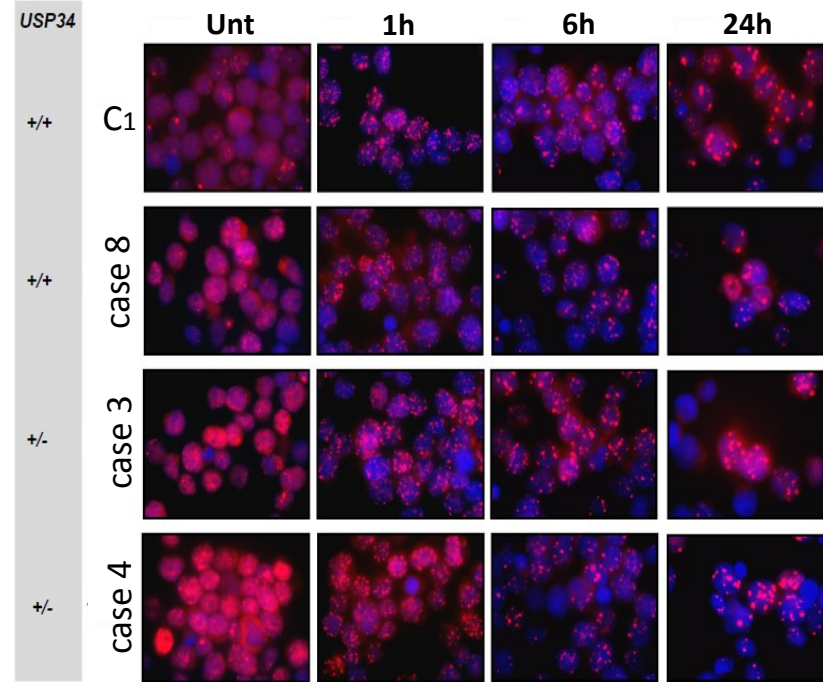

**Supplemental Figure 3 – Haploinsufficiency of *USP34* is associated with reduced *USP34* expression.** A) *USP34* expression was assessed by titrating increasing concentrations of whole-cell extracts (WCE) (50mg, 100mg, 200mg) from control and patient LCLs. Antibodies against ATR confirmed equal loading. Case 3 and 4 with *USP34* deletion exhibit approximately 50% reduction in *USP34* expression. Quantification was performed using Image J. B) Increasing amounts of WCE prepared from LCLs with differing *USP34* copy number were probed with AXIN1. MCM2 antibody confirmed equal loading. C) LCLs were either untreated (Unt) or irradiated with 3Gy ionizing radiation (IR) and 53BP1 foci formation monitored at different times post-irradiation. 53BP1 foci are used as a marker of double-strand breaks (DSBs) and can be used to assess double-strand break repair (DSB-R) capacity. IR-induced 53BP1 foci form and dissipate over time post-irradiation in LCLs with normal *USP34* copy number ( $C_1$  and case 8) similar to those with *USP34* deletion (case 3 and 4). Images were acquired at 40x magnification using the Zeiss Axioplan platform and SimplePCI software.  $C_1$  = Control;  $+/+$  = presence of both copies;  $+/-$  = Deletion of one copy (heterozygous)

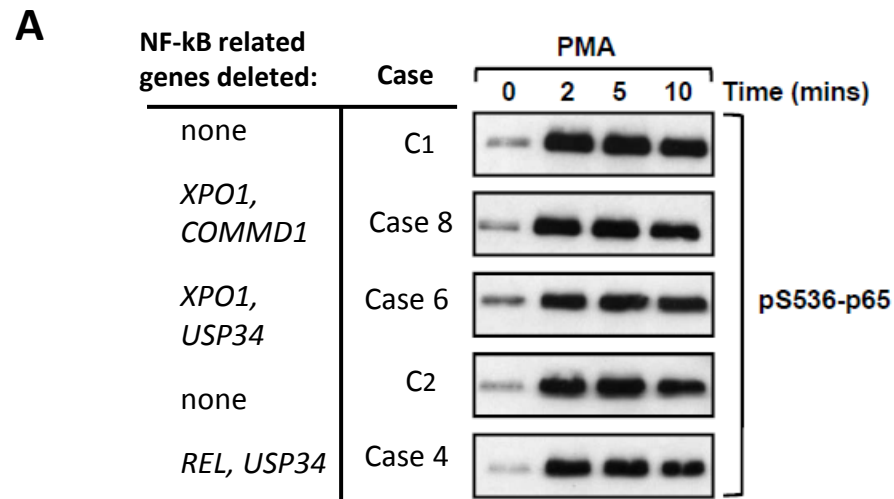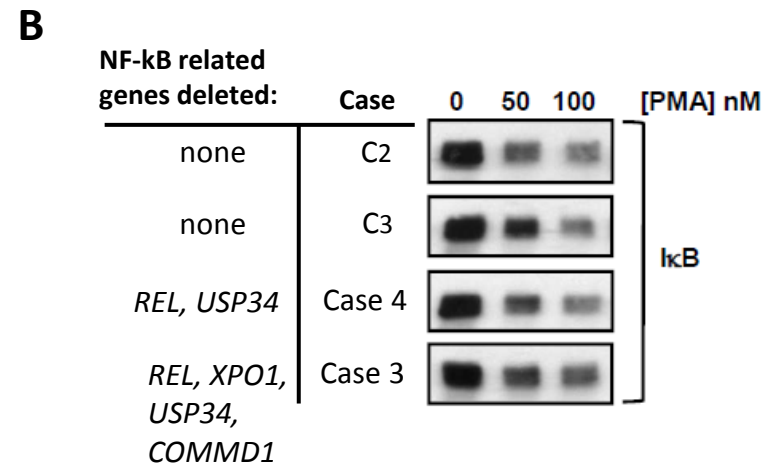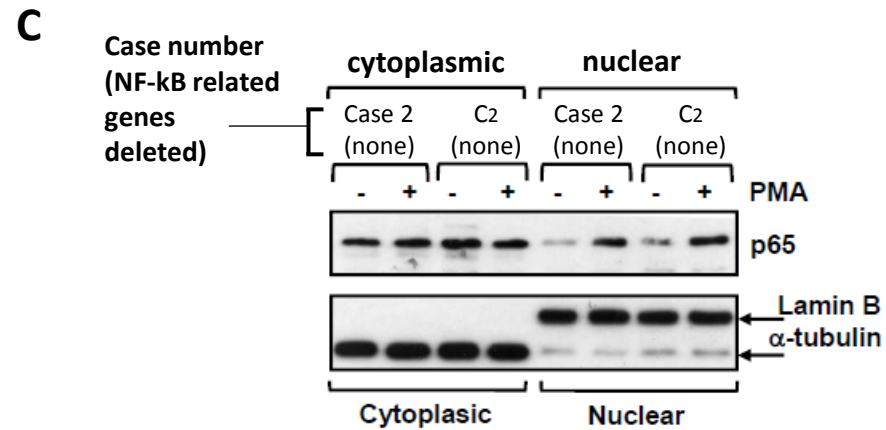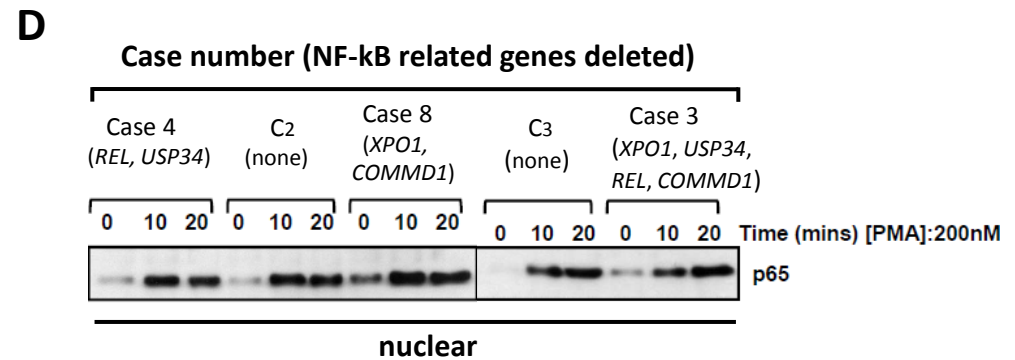

**Supplemental Figure 4 – NF- $\kappa$ B pathway analysis in patient cell-lines.** A) Phosphorylation of the NF- $\kappa$ B family transcription factor p65/RelA on serine 536 (pS536-p65) was assessed at different times in patient lymphoblast cell lines (LCLs) with differing deletions of NF- $\kappa$ B related genes following treatment with 200nM Phorbol 12 Myristate 13-Acetate (PMA) to induce NF- $\kappa$ B pathway. Phosphorylation was induced and maintained equally in control cells (C<sub>1</sub> and C<sub>2</sub>) with normal copy number of NF- $\kappa$ B related genes compared to case 4 (with *REL* and *USP34* deletion), case 6 (with *XPO1* and *USP34* deletion), and case 8 (with *XPO1* and *COMMD1* deletion). B) NF- $\kappa$ B pathway activation occurs via phosphorylation and consequent ubiquitin-mediated degradation of IkB which enables the nuclear translocation of NF- $\kappa$ B family transcription factors. We assessed the kinetics of PMA-induced IkB degradation in patient LCLs with differing deletions of NF- $\kappa$ B related genes. LCLs were treated with increasing concentrations of PMA for 10 mins. IkB was degraded similarly and effectively in LCLs with normal NF- $\kappa$ B copy number (controls, C<sub>2</sub> and C<sub>3</sub>) compared to those with a deletion of NF- $\kappa$ B related genes; case 3 (with *REL*, *XPO1*, *USP34*, and *COMMD1* deletion) and case 4 (with *REL* and *USP34* deletion). C) The penultimate step of NF- $\kappa$ B pathway involves the nuclear translocation of activated NF- $\kappa$ B family transcription factors where they regulate expression of their target genes. We assessed PMA-mediated nuclear translocation of p65/RelA by fractionating various LCLs into cytoplasmic and nuclear extracts. LCLs from a control (C<sub>2</sub>) and case 2, which had no NF- $\kappa$ B related genes deleted, when treated with PMA (200nM 10mins), showed marked increase in p65 levels in the nuclear fraction. The quality of the fractionation was assessed by reciprocal blotting for expression of a nuclear protein (Lamin B) and a cytoplasmic protein ( $\alpha$ -tubulin). D) Nuclear translocation was assessed in control LCLs (C<sub>2</sub> and C<sub>3</sub>) lacking NF- $\kappa$ B related gene deletions and case 3 (with *XPO1*, *USP34*, *REL*, and *COMMD1* deleted), case 4 (with *REL* and *USP34* deleted), and case 8 (with *XPO1* and *COMMD1* deleted) following treatment with 200nM PMA at the times indicated. PMA-induced nuclear recruitment of p65 was unaffected by the copy number of indicated NF- $\kappa$ B related genes.

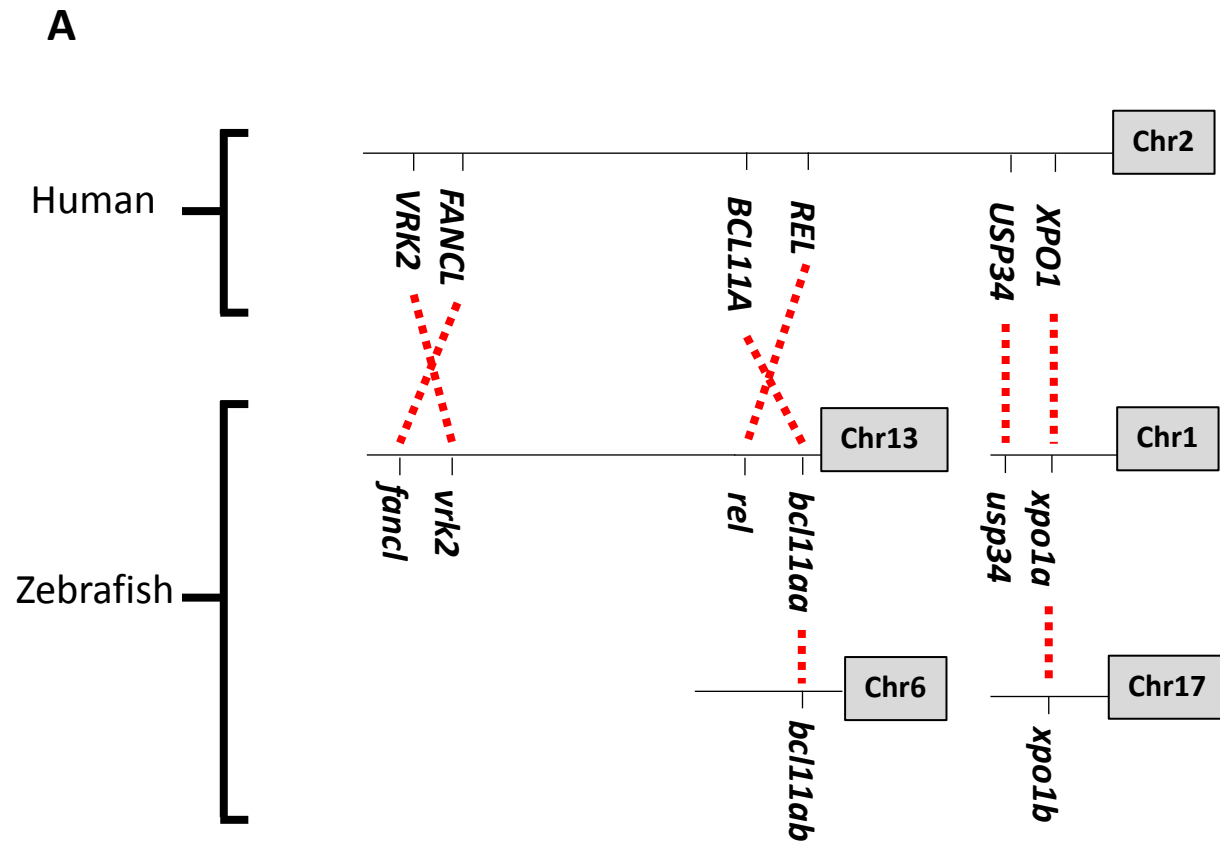

**B**

| Human gene   | Zebrafish orthologue | % Protein homology |
|--------------|----------------------|--------------------|
|              | <i>xpo1b</i>         | 90                 |
| <i>REL</i>   | <i>rel</i>           | 51                 |
|              | <i>bcl11ab</i>       | 64                 |
| <i>FANCL</i> | <i>fancl</i>         | 58                 |

**Supplemental Figure 5 – 2p15p16.1 gene synteny and protein homology in human versus zebrafish.**

A) Location of 2p15p16.1 genes in relation to each other extracted from the UCSC genome browser and Ensembl database. B) *XPO1* and *BCL11A* genes have two orthologous copies in zebrafish: (*xpo1a*, *xpo1b*) and (*bcl11aa*, *bcl11ab*), respectively. All other genes have a single zebrafish ortholog. The % protein homology of the genes were obtained by sequence alignment of human and zebrafish proteins using Clustal Omega Multiple Sequence Alignment web-tool (EMBL). *XPO1*, *USP34*, and *BCL11A* were the highly conserved genes with ~80-90% protein homology.

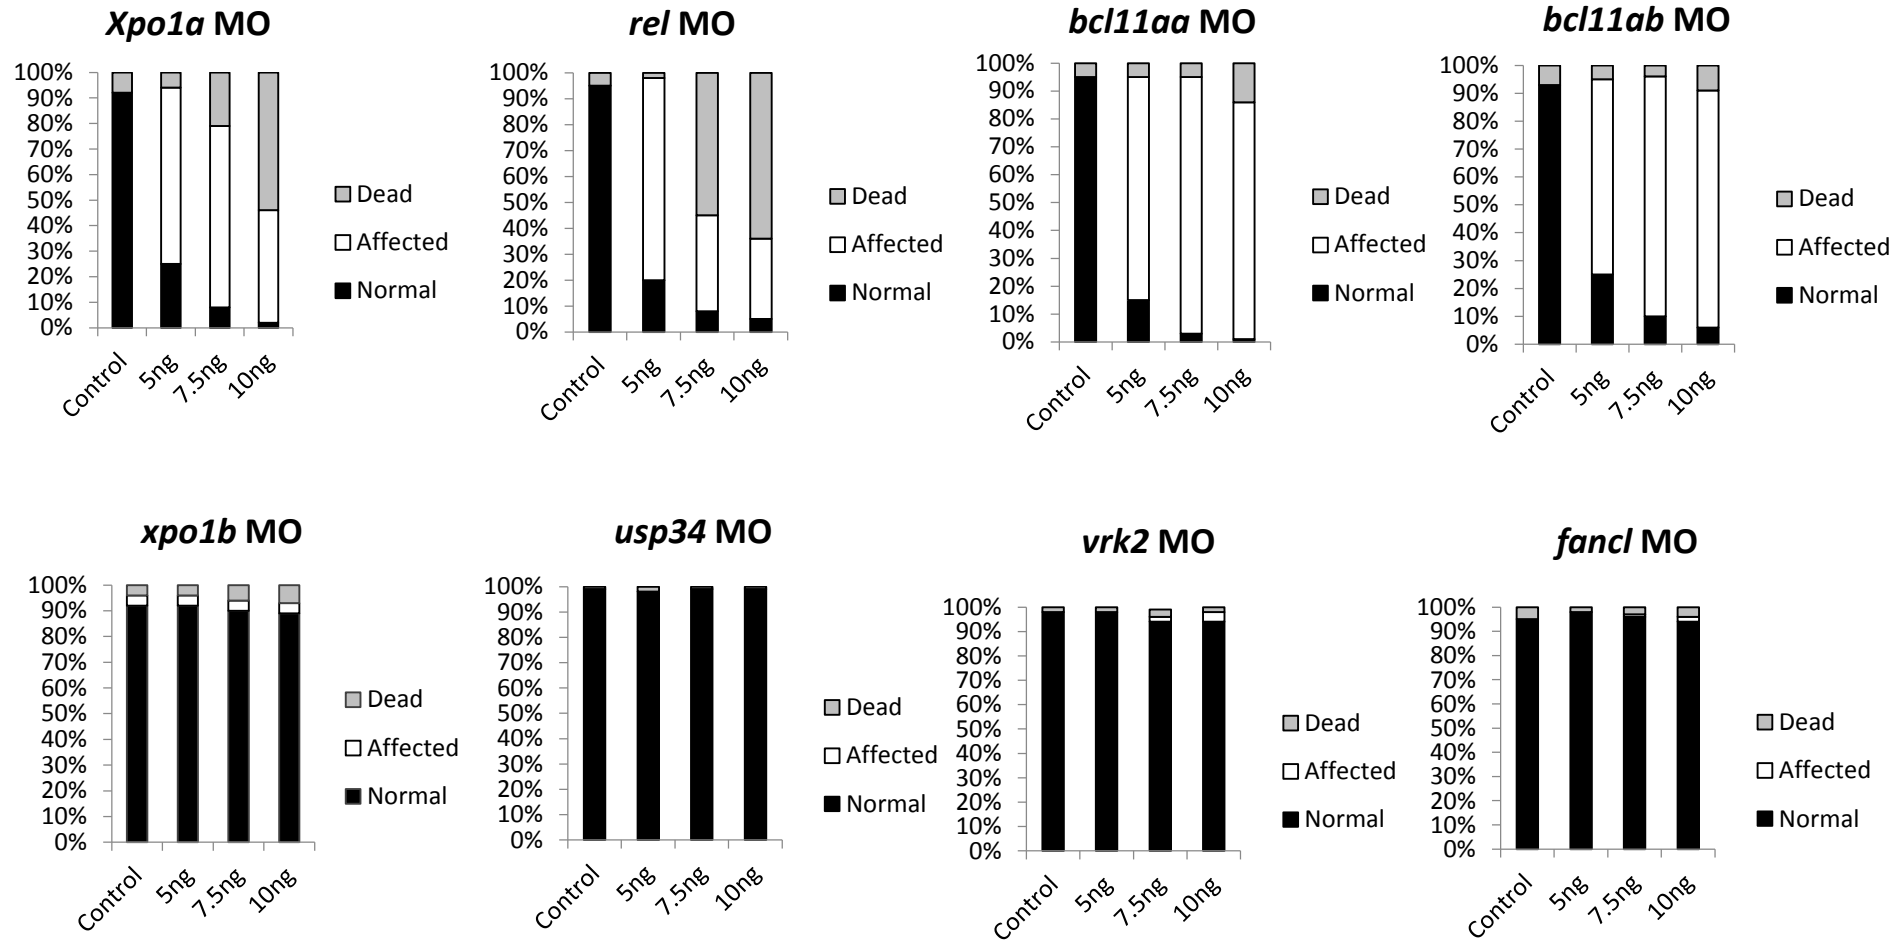

**Supplemental Figure 6 – Morpholino titration analysis for 2p15p16.1 zebrafish orthologous genes.**

Dose-response curve of *xpo1a*, *xpo1b*, *rel*, *usp34*, *bcl11aa*, *bcl11ab*, *vrk2*, and *fanc1* morpholinos (MOs) were obtained by injection of 1-2 cell stage wild-type zebrafish embryos with increasing concentrations of MOs (5ng, 7.5ng, and 10ng). The head and body size/structure of injected fish were compared with control embryos (injected with 10ng of gene-mismatch MOs) and the % of embryos with normal, affected, or dead phenotypes were scored at 3 days post-fertilisation (dpf).

**A**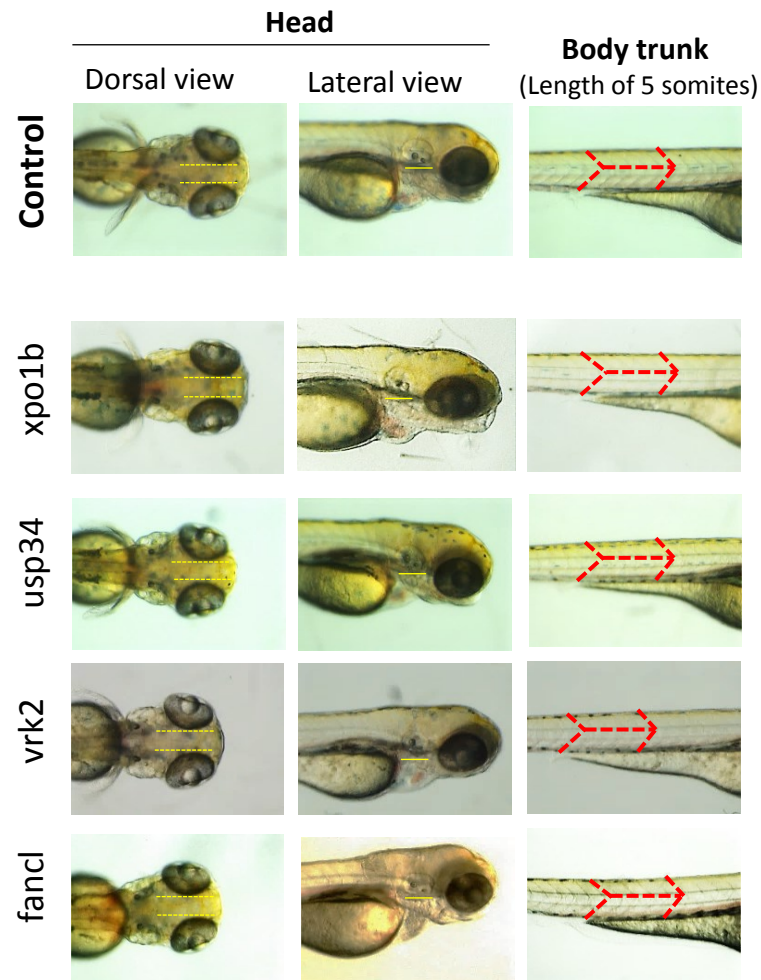

**Supplemental Figure 7 – No head and body abnormalities were detected for *xpo1b*, *usp34*, *vrk2*, and *fancl* morphants.** A) Microscopic images and B) size measurements of the head (distance between the eyes), otic vesicle, and the body trunk (distance between 5 tail somites) of the 3 days post-fertilisation (dpf) embryos that were injected with *xpo1b*, *usp34*, *vrk2*, and *fancl* morpholinos (MOs). The size measurements were carried out with ImageJ software, normalized to the sizes obtained in controls and the ratios were plotted. No significant difference in the head, otic vesicle, and body size was noted in morphants versus controls. Images were acquired at 115x magnification. Data represented as Mean  $\pm$  S.D. from 3 independent injections. N=50 embryos per gene per injection. Student's t-test was used to determine the significance of the differences for measured sizes between each gene morphant and controls. ns =  $p > 0.01$

**B**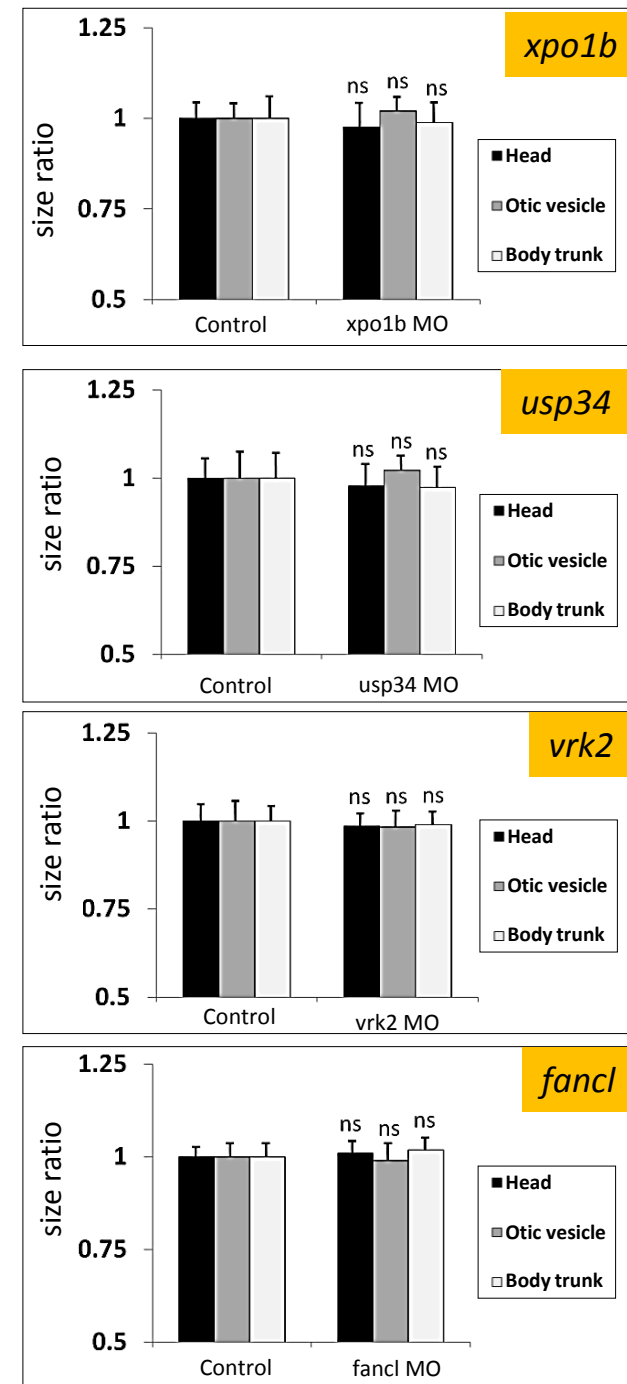

**A**

| Zebrafish gene           | SB-MO knockdown consequence | Amplified region with PCR (normal size) | Expected PCR products in MO vs MM                                       |
|--------------------------|-----------------------------|-----------------------------------------|-------------------------------------------------------------------------|
| <i>xpo1a</i>             | Exon 9 (129bp) deletion     | e8-e11 (420 bp)                         | Absence/low normal PCR amplicon; presence of truncated product (291 bp) |
| <i>xpo1b</i>             | Intron 1 (1999bp) inclusion | e1-e6 (464 bp)                          | Absence/low normal PCR amplicon; presence of larger product (2125 bp)   |
| <i>rel</i> *             | -                           | -                                       | -                                                                       |
| <i>usp34</i>             | Exon 2 (119bp) deletion     | e1-e3 (489 bp)                          | Absence/low normal PCR amplicon; presence of truncated product (370 bp) |
| <i>bcl11aa</i>           | Intron 1 (3250bp) inclusion | 5' UTR-e2 (363 bp)                      | Absence/low normal PCR amplicon; presence of larger product (3613 bp)   |
| <i>bcl11ab</i>           | Intron 1 (7226bp) inclusion | 5' UTR-e2 (353 bp)                      | Absence/low normal PCR amplicon; presence of larger product (7579 bp)   |
| <i>fancl</i>             | Exon 3 (61bp) deletion      | e1-e5 (297 bp)                          | Absence/low normal PCR amplicon; presence of truncated product (236 bp) |
| <i>vrk2</i>              | Exon 4 (88bp) deletion      | e2-e5 (300 bp)                          | Absence/low normal PCR amplicon; presence of truncated product (212bp)  |
| <i>Actb2 (bactin2)**</i> | N/A                         | e4-e5 (322 bp)                          | Comparable levels of PCR product between MO vs MM                       |

Abbreviations: SB-MO = Splice-blocking morpholino; MM = Mismatch control; N/A = Not applicable; e = exon; i = intron; F = Forward; R = Reverse; UTR = Untranslated region

§ Presence of large products (>1000 bp) were difficult to detect due to their large size, therefore we assessed the intensity of the normal PCR amplicon vs MM controls to confirm successful knock-down.

\* *rel* knockdown was not successful with two independently designed splice-blocking morpholinos, therefore translation-blocking morpholino was used and knockdown was confirmed with western-blotting.

\*\* primer sequences for *Actb2* were obtained from Casadei et al., (2011) (PMID: 21281742) and were used as the housekeeping gene control

**B**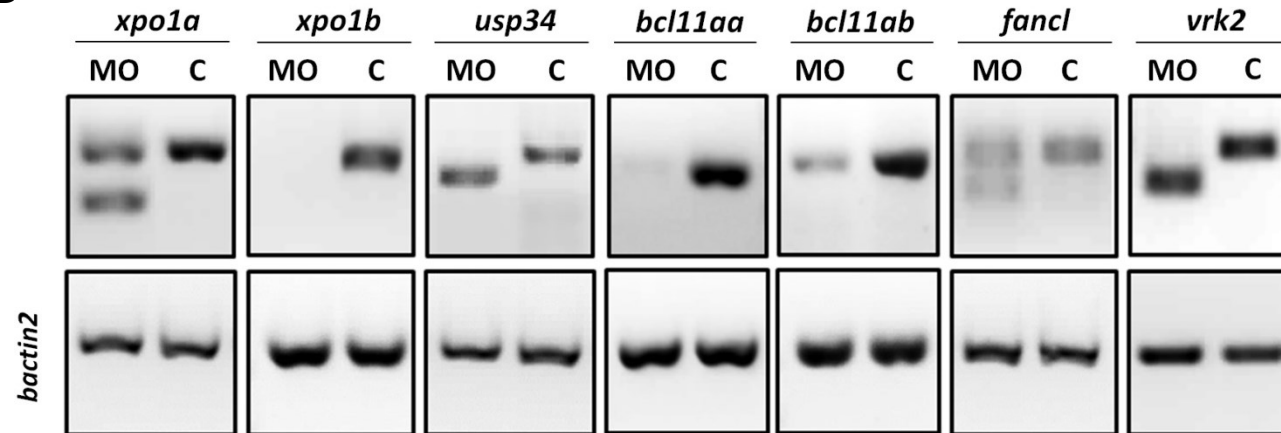**C**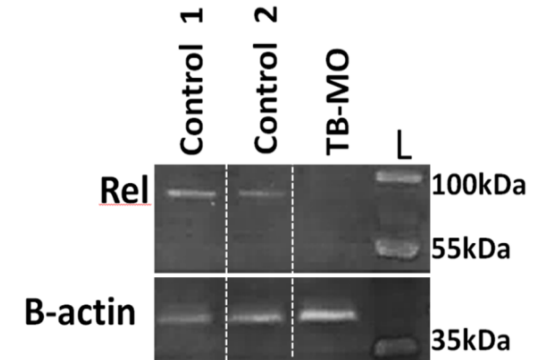

**Supplemental Figure 8 – Confirmation of gene knockdown in zebrafish embryos by RT-PCR.** A) Expected consequence of splice-blocking morpholino (SB-MO) knockdown on each gene transcript sequence and B) the agarose gel electrophoresis images of RT-PCR products from total RNA extracted from the morphant fish embryos. SB-MOs designed for each gene had specific exon-intron boundary target sites (as indicated). Primers surrounding the target site were designed to amplify the region of splice-blockage. All SB-MO injections (except for *rel*) successfully knocked-down the gene-of-interest, as was shown by change in the sequence, hence the size of the transcript, and/or intensity of the PCR product in comparison to controls. Equal loading was controlled with *bactin2*. C) For *rel*, we confirmed the gene knockdown by analysing the protein expression through western-blotting in translation-blocking morpholino (TB-MO) injected embryos.







Supplemental Table 2 – Breakpoints of 2p15p16.1 microdeletion in 33 cases.

| Case                                           | Chr | Start      | End        | Size      |                  | Gender | Inheritance                              | Platform                                                                       | Additional reported genomic findings                                                                                                                                                            |
|------------------------------------------------|-----|------------|------------|-----------|------------------|--------|------------------------------------------|--------------------------------------------------------------------------------|-------------------------------------------------------------------------------------------------------------------------------------------------------------------------------------------------|
| Florisson et al. 2013 (1)                      | 2   | 55,616,146 | 62,362,249 | 6,746,103 | min del          | Male   | <i>de novo</i> , parental origin ND      | Affymetrix 250K Nsp1 SNP array, fine mapping by qPCR                           | None reported                                                                                                                                                                                   |
|                                                |     | 55,580,038 | 62,416,010 | 6,835,972 | bal              |        |                                          |                                                                                |                                                                                                                                                                                                 |
| Rajcan-Separovic et al. 2007 (2)               | 2   | 55,627,639 | 63,519,476 | 7,891,837 |                  | Male   | <i>de novo</i> , paternal allele deleted | Affymetrix Genome-Wide Human SNP Array 6.0 (*)                                 | Maternal del at 16p13.11 (1.1 Mb)                                                                                                                                                               |
| Case_1                                         | 2   | 55,676,099 | 65,250,541 | 9,574,442 |                  | Male   | <i>de novo</i> , parental origin ND      | Affymetrix CytoScan 750K Array, hg19                                           | No additional pathogenic CNVs Reported                                                                                                                                                          |
|                                                |     |            |            |           |                  |        |                                          |                                                                                | Paracentric inversion of chromosome 7 and an apparently balanced translocation between chromosome 1 and 7, involving the inverted chromosome 7 [46,XX,der(7)inv(7)(q21.1q32.1)t(1;7)(q23q32.1)] |
| Prontera et al. 2011                           | 2   | 56,853,162 | 60,380,981 | 3,527,819 |                  | Female | <i>de novo</i> , parental origin ND      | Affymetrix Genome-Wide Human SNP Array 6.0                                     |                                                                                                                                                                                                 |
| Rajcan-Separovic et al. 2007 (1)               | 2   | 56,919,993 | 63,032,165 | 6,112,172 |                  | Female | <i>de novo</i> , parental allele NI      | Affymetrix Genome-Wide Human SNP Array 6.0 (*)                                 | Paternal del at Xp22.31 (1.4 Mb)                                                                                                                                                                |
| Case_2                                         | 2   | 57,606,726 | 59,619,316 | 2,012,590 |                  | Male   | <i>de novo</i> , parental origin ND      | Affymetrix CytoScan 750K Array, hg19                                           | <i>de novo</i> 12p11.21-q11 del (6.5 Mb)**; <i>de novo</i> 2p16.1 BCL11A intronic del (17 Kb), 2p16.1 intergenic del (22.55 Kb)                                                                 |
| de Leeuw et al. 2008                           | 2   | 58,216,217 | 61,667,426 | 3,451,209 | min del          | Male   | <i>de novo</i> , parental origin ND      | Fine mapping by qPCR in Florisson paper (*)                                    | Mosaic del 2p15-16.1 (20/30 cells observed with deletion)                                                                                                                                       |
|                                                |     | 58,024,114 | 61,873,699 | 3,849,585 | bal              |        |                                          |                                                                                |                                                                                                                                                                                                 |
| Florisson et al. 2013 (2)                      | 2   | 58,714,795 | 65,392,528 | 6,677,733 | min del          | Female | <i>de novo</i> , parental origin ND      | Affymetrix 250K Nsp1 SNP array, fine mapping by qPCR                           | None reported                                                                                                                                                                                   |
|                                                |     | 58,685,038 | 65,440,018 | 6,754,980 | bal              |        |                                          |                                                                                |                                                                                                                                                                                                 |
| Case_3                                         | 2   | 59,017,244 | 64,379,673 | 5,362,429 |                  | Male   | <i>de novo</i> , paternal allele deleted | Affymetrix Cytogenetics Whole-Genome 2.7M Array                                | No additional pathogenic CNVs Reported                                                                                                                                                          |
| Felix et al. 2010                              | 2   | 59,139,200 | 62,488,871 | 3,349,671 |                  | Female | <i>de novo</i> , paternal allele deleted | Affymetrix Genome-Wide Human SNP Array 6.0                                     | None reported                                                                                                                                                                                   |
| Liang et al. 2009                              | 2   | 59,241,620 | 62,385,716 | 3,144,096 |                  | Female | <i>de novo</i> , paternal allele deleted | Agilent Human Genome CGH Microarray Kit 105A                                   | Polymorphic inversion of chr 9                                                                                                                                                                  |
| Balci et al. 2015/Basak et al. 2015 (3)        | 2   | 59,958,420 | 60,834,298 | 875,878   | min del          | Female | <i>de novo</i> , parental origin ND      | Agilent 180K oligonucleotide array                                             | None reported                                                                                                                                                                                   |
|                                                |     | 59,939,228 | 60,856,351 | 917,123   | bal              |        |                                          |                                                                                |                                                                                                                                                                                                 |
| Basak et al. 2015 (2)                          | 2   | 60,029,857 | 61,059,383 | 1,029,526 |                  | NA     | <i>de novo</i> , parental origin ND      | Human CytoSNP-12 BeadChips (Illumina)                                          | None reported                                                                                                                                                                                   |
| Jorgez et al. 2014 (4)                         | 2   | 60,066,496 | 66,376,496 | 6,310,000 |                  | Male   | <i>de novo</i> , parental origin ND      | SignatureChipOS v3.0                                                           | None reported                                                                                                                                                                                   |
| Ottolini et al. 2015                           | 2   | 60,118,706 | 61,800,462 | 1,681,756 |                  | Female | <i>de novo</i> , parental origin ND      | Not mentioned                                                                  | None reported                                                                                                                                                                                   |
| Piccione et al. 2012 (2)                       | 2   | 60,257,496 | 62,762,496 | 2,505,000 |                  | Male   | <i>de novo</i> , parental origin ND      | Agilent Human Genome CGH 244A array                                            | <i>de novo</i> Xq28 del (29 kb)                                                                                                                                                                 |
| Piccione et al. 2012 (1)                       | 2   | 60,603,496 | 61,246,496 | 643,000   |                  | Female | <i>de novo</i> , paternal allele deleted | Agilent Human Genome CGH 44K array                                             | Paternal 6q12 del (930 Kb)                                                                                                                                                                      |
| Case_4                                         | 2   | 60,650,589 | 61,621,631 | 971,042   |                  | Female | <i>de novo</i> , parental origin ND      | Affymetrix CytoScan 750K Array, hg19                                           | No additional pathogenic CNVs Reported                                                                                                                                                          |
| Huchtagowder et al. 2012                       | 2   | 60,672,255 | 63,144,695 | 2,472,440 |                  | Female | <i>de novo</i> , parental origin ND      | Affymetrix Genome-Wide Human SNP Array 6.0                                     | None reported                                                                                                                                                                                   |
|                                                |     |            |            |           | min del reported | Male   | <i>de novo</i> , parental origin ND      | EmArray Cyto6000 v.2 (Emmory University)                                       | 2q13 del (343 Kb) and 6p25.3 del (80 Kb), unknown origin                                                                                                                                        |
| Peter et al. 2014                              | 2   | 60,689,299 | 60,830,491 | 141,192   |                  | Male   | <i>de novo</i> , parental origin ND      |                                                                                |                                                                                                                                                                                                 |
|                                                |     |            |            | 203,000   |                  |        |                                          |                                                                                | Large run of homozygosity (ROH) on proximal side of 2p deletion, extends to ~61,809,113 bp (supplemental figure S1), negative testing for fragile X and Rett syndromes (MECP2)                  |
| Hancarova et al. 2013b / Basak et al. 2015 (1) | 2   | 60,689,977 | 61,127,979 | 438,002   |                  | Female | <i>de novo</i> , paternal allele deleted | Illumina Human CytoSNP-12 BeadChip array, fine mapping of proximal bpt by MLPA |                                                                                                                                                                                                 |
| Jorgez et al. 2014 (5)                         | 2   | 61,056,496 | 65,656,496 | 4,600,000 |                  | Male   | <i>de novo</i> , parental origin ND      | SignatureChipOS v2.0 (135K)                                                    | None reported                                                                                                                                                                                   |
| Case_5                                         | 2   | 61,060,687 | 65,653,379 | 4,592,692 |                  | Male   | <i>de novo</i> , parental origin ND      | Signature Genomics SignatureChipOS™                                            | No additional pathogenic CNVs Reported                                                                                                                                                          |
| Jorgez et al. 2014 (3)                         | 2   | 61,126,496 | 63,516,496 | 2,390,000 |                  | Male   | <i>de novo</i> , parental origin ND      | SignatureChipOS v1.0 (105K)                                                    | None reported                                                                                                                                                                                   |
| Chabchoub et al. 2008                          | 2   | 61,203,258 | 61,786,583 | 583,325   |                  | Male   | <i>de novo</i> , parental origin ND      | Affymetrix CytoScan 750K Array, hg19 (*)                                       | None Reported, Negative testing for Marfan syndrome (FBN1) and Williams-Beuren (ELN)                                                                                                            |
| Case_6                                         | 2   | 61,438,499 | 61,797,959 | 359,460   |                  | Male   | <i>de novo</i> , parental origin ND      | Affymetrix Genome-Wide Human SNP Array 6.0                                     | No additional pathogenic CNVs Reported                                                                                                                                                          |
| Shimojima et al. 2015 (1)                      | 2   | 61,495,220 | 61,733,075 | 237,855   |                  | Male   | <i>de novo</i> , parental origin ND      | Agilent 60 K Human Genome CGH Microarray                                       | None reported                                                                                                                                                                                   |
|                                                |     |            |            |           |                  |        |                                          |                                                                                | Fragile site at 12q13.2 (benign variant), maternal 9p24.3 dup (493,399 Kb), maternal 9p24.3 dup (408,965 Kb), paternal 17q25.3 dup (656,833 Kb)                                                 |
| Fannemel et al. 2014                           | 2   | 61,500,346 | 61,733,075 | 232,729   |                  | Male   | <i>de novo</i> , parental origin ND      | Agilent 180K SurePrint G3 Human CGH                                            |                                                                                                                                                                                                 |
| Jorgez et al. 2014 (6)                         | 2   | 61,566,496 | 64,316,496 | 2,750,000 |                  | Male   | <i>de novo</i> , parental origin ND      | Exon targeted 180K Oligo array (BCM V.8)                                       | None reported                                                                                                                                                                                   |
| Case_7                                         | 2   | 61,585,906 | 64,253,124 | 2,667,218 |                  | Male   | <i>de novo</i> , maternal allele deleted | Affymetrix Cytogenetics Whole-Genome 2.7M Array                                | No additional pathogenic CNVs Reported                                                                                                                                                          |
| Shimojima et al. 2015 (2)                      | 2   | 61,618,699 | 65,142,743 | 3,524,044 |                  | Female | undetermined                             | Agilent 60 K Human Genome CGH Microarray                                       | None reported                                                                                                                                                                                   |
| Ronzoni et al. 2015                            | 2   | 61,659,957 | 61,762,873 | 102,916   |                  | Male   | <i>de novo</i> , parental origin ND      | Agilent 180K                                                                   | None reported                                                                                                                                                                                   |

Genomic data are based on hg19 assembly.

Florisson et al. 2013 - Breakpoints calculated based on qPCR data in Table 1 and Table SI in paper.

NI - non informative

ND - not determined

\* Updated breakpoints from original report, arrays re-run for cases have highest resolution array reported

\*\* Case 2 also had a secondary CNV of 6.5Mb (de novo deletion of 12q pericentromeric region). The coding part of this CNV was 1.5Mb and included 11 reference genes and 4 OMIM genes, only one of which was bioinformatically predicted to be haploinsufficient (DNM1L). The OMIM genes were associated with phenotypes not noted in the patient namely lethal encephalopathy due to defective mitochondrial and peroxisomal fission (DNM1L), Charcot-Marie-Tooth disease type 4H (CMT4H) (FGD4), arrhythmogenic right ventricular cardiomyopathy (PKP2), myopathy, lactic acidosis, and sideroblastic anemia (YARS2). The EEG test for this patient was normal, excluding the role of PKP2, and the role of other genes based on the phenotypes is not likely but cannot be excluded.

**Supplemental Table 3** – DNA repeated (RMSK) elements in regions flanking 2p15p16.1 deletions.

| Deletion Flank |          |          |                                  | RMSK Element   |                |         |          |          |        |           |
|----------------|----------|----------|----------------------------------|----------------|----------------|---------|----------|----------|--------|-----------|
| Chr            | Start    | Stop     | Case_Flank                       | Family         | Class          | Name    | Start    | End      | strand | Size (bp) |
| chr2           | 55675599 | 55676099 | Case_1_distal                    | L1             | LINE           | L1MC4a  | 55675474 | 55676356 | -      | 882       |
| chr2           | 59619316 | 59619816 | Case_2_proximal                  | ERV1-MaLR      | LTR            | THE1D   | 59619754 | 59620128 | -      | 374       |
| chr2           | 64379673 | 64380173 | Case_3_proximal                  | L1             | LINE           | L1MEd   | 64379813 | 64380363 | -      | 550       |
| chr2           | 64379673 | 64380173 | Case_3_proximal                  | L1             | LINE           | L1M5    | 64379554 | 64379772 | -      | 218       |
| chr2           | 61621631 | 61622131 | Case_4_proximal                  | Alu            | SINE           | AluJb   | 61621499 | 61621693 | +      | 194       |
| chr2           | 61060188 | 61060688 | Case_5_distal                    | Alu            | SINE           | AluJb   | 61060472 | 61060559 | +      | 87        |
| chr2           | 61060188 | 61060688 | Case_5_distal                    | MIR            | SINE           | MIR     | 61060605 | 61060709 | +      | 104       |
| chr2           | 61438000 | 61438500 | Case_6_distal                    | Alu            | SINE           | AluJb   | 61437854 | 61438072 | -      | 218       |
| chr2           | 61797959 | 61798459 | Case_6_proximal                  | Alu            | SINE           | AluSp   | 61798046 | 61798342 | -      | 296       |
| chr2           | 61797959 | 61798459 | Case_6_proximal                  | Alu            | SINE           | FRAM    | 61797931 | 61797967 | -      | 36        |
| chr2           | 61797959 | 61798459 | Case_6_proximal                  | L1             | LINE           | L1MC4   | 61797984 | 61798046 | +      | 62        |
| chr2           | 61797959 | 61798459 | Case_6_proximal                  | L1             | LINE           | L1MC4   | 61798342 | 61798364 | +      | 22        |
| chr2           | 61797959 | 61798459 | Case_6_proximal                  | Alu            | SINE           | AluSg4  | 61798369 | 61798668 | +      | 299       |
| chr2           | 61585407 | 61585907 | Case_7_distal                    | L1             | LINE           | L1MB4   | 61585365 | 61585565 | +      | 200       |
| chr2           | 61585407 | 61585907 | Case_7_distal                    | L1             | LINE           | L1MB4   | 61585567 | 61586788 | +      | 1221      |
| chr2           | 64253124 | 64253624 | Case_7_proximal                  | L2             | LINE           | L2a     | 64253622 | 64253756 | +      | 134       |
| chr2           | 64253124 | 64253624 | Case_7_proximal                  | L2             | LINE           | L2a     | 64253123 | 64253196 | +      | 73        |
| chr2           | 64253124 | 64253624 | Case_7_proximal                  | L2             | LINE           | L2a     | 64253483 | 64253546 | +      | 63        |
| chr2           | 61739267 | 61739767 | Case_8_distal                    | L1             | LINE           | L1M5    | 61739735 | 61739895 | +      | 160       |
| chr2           | 55615646 | 55616146 | Florisson-2013-1_distal          | L2             | LINE           | L2a     | 55615767 | 55615850 | +      | 83        |
| chr2           | 55615646 | 55616146 | Florisson-2013-1_distal          | Low_complexity | Low_complexity | AT_rich | 55616074 | 55616123 | +      | 49        |
| chr2           | 62362249 | 62362749 | Florisson-2013-1_proximal        | MIR            | SINE           | MIRb    | 62362209 | 62362422 | +      | 213       |
| chr2           | 62362249 | 62362749 | Florisson-2013-1_proximal        | Alu            | SINE           | AluY    | 62362489 | 62362784 | -      | 295       |
| chr2           | 63519476 | 63519976 | Rajcan-Separovic-2007-2_proximal | L1             | LINE           | L1M4c   | 63519861 | 63521356 | +      | 1495      |

|      |          |          |                                  |               |               |           |          |          |   |     |
|------|----------|----------|----------------------------------|---------------|---------------|-----------|----------|----------|---|-----|
| chr2 | 56852663 | 56853163 | Prontera-2010_distal             | ERVL          | LTR           | LTR33A    | 56852798 | 56853220 | - | 422 |
| chr2 | 60380981 | 60381481 | Prontera-2010_proximal           | ERVL-MaLR     | LTR           | MLT1F2    | 60380678 | 60381217 | - | 539 |
| chr2 | 60380981 | 60381481 | Prontera-2010_proximal           | L2            | LINE          | L2a       | 60381300 | 60381435 | - | 135 |
| chr2 | 56919494 | 56919994 | Rajcan-Separovic-2007-1_distal   | L1            | LINE          | L1PREC2   | 56919183 | 56920080 | - | 897 |
| chr2 | 63032165 | 63032665 | Rajcan-Separovic-2007-1_proximal | L1            | LINE          | L1ME4a    | 63032167 | 63032640 | + | 473 |
| chr2 | 63032165 | 63032665 | Rajcan-Separovic-2007-1_proximal | hAT-Charlie   | DNA           | MER1B     | 63031826 | 63032167 | + | 341 |
| chr2 | 63032165 | 63032665 | Rajcan-Separovic-2007-1_proximal | Alu           | SINE          | AluSz     | 63032659 | 63032949 | - | 290 |
| chr2 | 58215717 | 58216217 | deLeeuw-2008_distal              | ERVL          | LTR           | MLT2B2    | 58215515 | 58216042 | + | 527 |
| chr2 | 61667426 | 61667926 | deLeeuw-2008_proximal            | Alu           | SINE          | AluSq2    | 61667653 | 61667952 | - | 299 |
| chr2 | 58714295 | 58714795 | Florisson-2013-2_distal          | ERV1          | LTR           | LTR27     | 58714137 | 58714616 | - | 479 |
| chr2 | 59138700 | 59139200 | Felix-2010_distal                | Simple_repeat | Simple_repeat | (TG)n     | 59138982 | 59139028 | + | 46  |
| chr2 | 62488871 | 62489371 | Felix-2010_proximal              | Alu           | SINE          | AluSx3    | 62488796 | 62489058 | + | 262 |
| chr2 | 62488871 | 62489371 | Felix-2010_proximal              | ERV1          | LTR           | LTR49-int | 62489058 | 62489255 | - | 197 |
| chr2 | 62385716 | 62386216 | Liang-2009_proximal              | L1            | LINE          | L1M4b     | 62385941 | 62386419 | + | 478 |
| chr2 | 60256997 | 60257497 | Piccone-2012-2_distal            | MIR           | SINE          | MIRb      | 60257339 | 60257530 | - | 191 |
| chr2 | 62762496 | 62762996 | Piccone-2012-2_proximal          | ERV1          | LTR           | LTR12F    | 62762587 | 62763076 | - | 489 |
| chr2 | 60602997 | 60603497 | Piccone-2012-1_distal            | ERVL          | LTR           | LTR16A    | 60603042 | 60603467 | - | 425 |
| chr2 | 61246496 | 61246996 | Piccone-2012-1_proximal          | L1            | LINE          | L1M5      | 61246365 | 61247111 | - | 746 |
| chr2 | 60671756 | 60672256 | Huchtagowder-2012_distal         | L2            | LINE          | L2a       | 60672083 | 60672212 | + | 129 |
| chr2 | 63144695 | 63145195 | Huchtagowder-2012_proximal       | Alu           | SINE          | AluSz     | 63145033 | 63145331 | - | 298 |
| chr2 | 63144695 | 63145195 | Huchtagowder-2012_proximal       | ERVL          | LTR           | LTR40c    | 63144876 | 63144974 | - | 98  |
| chr2 | 63144695 | 63145195 | Huchtagowder-2012_proximal       | MIR           | SINE          | MIRc      | 63144639 | 63144711 | - | 72  |
| chr2 | 60689478 | 60689978 | Hancarova-2012_distal            | MIR           | SINE          | MIR3      | 60689893 | 60689972 | + | 79  |
| chr2 | 61127979 | 61128479 | Hancarova-2012_proximal          | Alu           | SINE          | AluSq2    | 61128279 | 61128595 | - | 316 |
| chr2 | 61202758 | 61203258 | Chabchoub-2008_distal            | Alu           | SINE          | AluSx1    | 61202886 | 61203196 | - | 310 |
| chr2 | 61202758 | 61203258 | Chabchoub-2008_distal            | MIR           | SINE          | MIRb      | 61203230 | 61203342 | + | 112 |
| chr2 | 61786583 | 61787083 | Chabchoub-2008_proximal          | Alu           | SINE          | AluJr     | 61786377 | 61786593 | - | 216 |

|      |          |          |                         |               |               |         |          |          |   |     |
|------|----------|----------|-------------------------|---------------|---------------|---------|----------|----------|---|-----|
| chr2 | 61786583 | 61787083 | Chabchoub-2008_proximal | Alu           | SINE          | AluSx3  | 61786653 | 61786948 | + | 295 |
| chr2 | 61786583 | 61787083 | Chabchoub-2008_proximal | Alu           | SINE          | AluY    | 61786950 | 61787253 | + | 303 |
| chr2 | 61499846 | 61500346 | Fannemel-2014_distal    | L2            | LINE          | L2      | 61499566 | 61499856 |   | 290 |
| chr2 | 61733075 | 61733575 | Fannemel-2014_proximal  | Alu           | SINE          | AluSz   | 61733275 | 61733575 |   | 300 |
| chr2 | 61733075 | 61733575 | Fannemel-2014_proximal  | Simple_repeat | Simple_repeat | (TAAA)n | 61733225 | 61733249 |   | 24  |

This table contains the Repeated Elements by RepeatMasker - <http://www.repeatmasker.org/> - (RMSK) that overlap with regions flanking 2p15p16.1 microdeletions (500 bp upstream & downstream). Genomic positions for the regions flanking each deletion (proximal or distal) are provided along with the case identifier. A total of 56 RMSK elements are listed along with their corresponding Family, Class, Name, Start, End, strand, and size (bp). The UCSC rmsk track includes up to ten different classes of repeats: short interspersed nuclear elements (SINE), which include ALUs, long interspersed nuclear elements (LINE), long terminal repeat elements (LTR), which include retroposons, DNA repeat elements (DNA), simple repeats (micro-satellites), low complexity repeats, satellite repeats, RNA repeats (including RNA, tRNA, rRNA, snRNA, scRNA, srpRNA), other repeats, which includes class RC (Rolling Circle), and a category labeled unknown. Genome assembly build used is Human Feb. 2009 (GRCh37/hg19).





|            |       |   |   |   |   |   |   |   |   |   |   |   |   |   |   |   |    |             |        |       |
|------------|-------|---|---|---|---|---|---|---|---|---|---|---|---|---|---|---|----|-------------|--------|-------|
| B3GNT2     | mRNA  | + | + | + | + | + | + | + | + | + | + | + | + | + | + | + | 16 | <b>48.5</b> |        | 36.11 |
| MIR5192    | ncRNA | + | + | + | + | + | + | + | + | + | + | + | + | + | + | + | 16 | <b>48.5</b> |        |       |
| TMEM17     | mRNA  | + | + | + | + | + |   | + | + |   | + | + | + | + | + | + | 14 | <b>42.4</b> | 37.90% | 32.65 |
| EHBP1      | mRNA  | + | + | + | + | + |   | + |   | + | + | + | + | + | + | + | 13 | <b>39.4</b> | 43.60% | 2.88  |
| AC009501.4 | ncRNA | + | + |   | + | + |   | + |   |   | + | + | + | + | + | + | 11 | <b>33.3</b> |        |       |
| OTX1       | mRNA  | + | + |   | + | + |   | + |   |   | + | + | + | + | + | + | 11 | <b>33.3</b> | 63.70% | 7.55  |
| DBIL5P2    | ncRNA | + | + |   | + | + |   | + |   |   | + | + | + | + | + | + | 11 | <b>33.3</b> |        |       |
| WDPCP      | mRNA  | + | + |   | + | + |   | + |   | + | + | + | + | + | + | + | 11 | <b>33.3</b> |        | 24.69 |
| MDH1       | mRNA  | + |   |   | + | + |   | + |   |   | + | + |   | + | + | + | 9  | <b>27.3</b> | 53.40% | 5.43  |
| UGP2       | mRNA  | + |   |   | + | + |   | + |   |   | + | + |   | + | + | + | 9  | <b>27.3</b> | 1.70%  | 6.89  |
| VPS54      | mRNA  | + |   |   | + | + |   | + |   |   | + | + |   | + | + | + | 9  | <b>27.3</b> | 41.60% | 7.35  |
| PELI1      | mRNA  | + |   |   | + | + |   | + |   |   | + | + |   |   |   | + | 7  | <b>21.2</b> | 6.20%  | 7.26  |
| LINC00309  | ncRNA | + |   |   | + |   |   | + |   |   | + | + |   |   |   | + | 6  | <b>18.2</b> |        |       |
| LGALS1     | mRNA  | + |   |   | + |   |   | + |   |   | + | + |   |   |   | + | 6  | <b>18.2</b> |        | 25.04 |
| AFTPH      | mRNA  | + |   |   | + |   |   | + |   |   | + | + |   |   |   | + | 6  | <b>18.2</b> | 17.80% | 20.39 |
| MIR4434    | ncRNA | + |   |   | + |   |   | + |   |   | + | + |   |   |   | + | 6  | <b>18.2</b> |        |       |
| AC007365.1 | ncRNA | + |   |   | + |   |   | + |   |   | + | + |   |   |   | + | 6  | <b>18.2</b> |        |       |
| SERTAD2    | mRNA  | + |   |   | + |   |   | + |   |   | + | + |   |   |   | + | 6  | <b>18.2</b> | 7.80%  | 27.45 |
| AC007880.1 | ncRNA | + |   |   | + |   |   | + |   |   | + | + |   |   |   | + | 6  | <b>18.2</b> |        |       |
| AC007386.2 | ncRNA | + |   |   | + |   |   | + |   |   | + | + |   |   |   | + | 6  | <b>18.2</b> |        |       |
| SLC1A4     | mRNA  | + |   |   | + |   |   | + |   |   | + | + |   |   |   |   | 5  | <b>15.2</b> | 69.00% | 39.21 |
| CEP68      | mRNA  |   |   |   | + |   |   | + |   |   | + | + |   |   |   |   | 4  | <b>12.1</b> | 92.90% | 83.58 |
| RAB1A      | mRNA  |   |   |   | + |   |   | + |   |   | + | + |   |   |   |   | 4  | <b>12.1</b> | 10.70% | 3.32  |
| ACTR2      | mRNA  |   |   |   |   |   |   | + |   |   | + | + |   |   |   |   | 3  | <b>9.1</b>  | 31.10% | 8.79  |
| SPRED2     | mRNA  |   |   |   |   |   |   | + |   |   | + | + |   |   |   |   | 3  | <b>9.1</b>  | 18.80% | 17.57 |

+ Gene included

(+) Gene possibly included based on data, not included in count

+ (in red color): Gene disrupted by the breakpoint

Non-coding RNA gene (ncRNA)

Protein coding gene (mRNA)

Bold – 16 genes deleted in >50% of cases

\* From Huang et al. 2010 Supplementary Table 2

**Supplemental Table 5** – A summary of known functions and mutations of genes deleted in >50% of cases and their animal knockout model reports.

| Gene            | Function (PubMed ID)                                                                                                                                                                                                                                       |                                                                                                                                                                                                                                                                                        | Other variants                                                                                                                                                                     | Animal knockout model (PubMed ID)                                                                                                                                                                                                                                                                                         |                                                                                                                                                                             |                                                                                                                                                                       |
|-----------------|------------------------------------------------------------------------------------------------------------------------------------------------------------------------------------------------------------------------------------------------------------|----------------------------------------------------------------------------------------------------------------------------------------------------------------------------------------------------------------------------------------------------------------------------------------|------------------------------------------------------------------------------------------------------------------------------------------------------------------------------------|---------------------------------------------------------------------------------------------------------------------------------------------------------------------------------------------------------------------------------------------------------------------------------------------------------------------------|-----------------------------------------------------------------------------------------------------------------------------------------------------------------------------|-----------------------------------------------------------------------------------------------------------------------------------------------------------------------|
|                 | Main biological role(s)                                                                                                                                                                                                                                    | Brain/neuronal-related function(s)                                                                                                                                                                                                                                                     | No. of reported mutations in HGMD [phenotypes (PubMed ID)]                                                                                                                         | Mouse (MGI or PubMed)                                                                                                                                                                                                                                                                                                     | Zebrafish                                                                                                                                                                   | Other                                                                                                                                                                 |
| <i>VRK2*</i>    | Encodes a serine/threonine protein kinase that modulates several signaling pathways including p53 signaling pathway and tumor cell growth (16704422). It acts as the negative-regulator of apoptosis (23449449).                                           | VRK2 acts as a modulator of accumulation of misfolded polyglutamine (polyQ) aggregation and toxicity in early stages of neurodegenerative disease progression by negative regulation of the chaperonin (CCT4) stability (24298020) through inhibiting USP25 deubiquitinase (25755282). | –                                                                                                                                                                                  | –                                                                                                                                                                                                                                                                                                                         | –                                                                                                                                                                           | –                                                                                                                                                                     |
| <i>FANCL*</i>   | Encodes a ubiquitin ligase that ubiquitinates FANCD2 which is an essential step in the FA pathway of DNA repair (19423727).                                                                                                                                | –                                                                                                                                                                                                                                                                                      | 11 [Fanconi anemia, autosomal recessive (24459294; 23613520; 25754594; 19405097; 22720145; 12973351)]                                                                              | abnormal male/female reproductive system and infertility; decreased embryo weight and complete prenatal/embryonic lethality (12417526)                                                                                                                                                                                    | Mutations in <i>fancl</i> in zebrafish leads to sex reversal by Tp53-mediated germ cell apoptosis, but no major phenotypic abnormalities are observed (21951543, 20661450). | Drosophila: Knockdown of FANCL results in viable and fertile flies with specific hypersensitivity to cross-linking agents and hence DNA repair deficiency (16860002). |
| <i>BCL11A</i>   | Encodes a zinc-finger protein which functions as a myeloid and B-cell proto-oncogene. It is associated with leukemogenesis and hematopoiesis and has been identified as a negative regulator of fetal hemoglobin (26125973, 26080908, 26019277, 25938782). | BCL11A have recently been associated with proper migration of cortical projection neurons and neurodevelopment (26182416, 26019277, 25938782)                                                                                                                                          | 2 [Increased fetal hemoglobin levels (24115442); Autism (22542183)]                                                                                                                | Abnormal immune-system morphology including decreased level of B-cells/T-cells/leukocytes ,abnormal humoral immune response ; abnormal hematopoiesis, erythropoiesis and decreased hemoglobin content; Abnormal neuronal/axon morphology and/or differentiation, complete neonatal lethality                              | –                                                                                                                                                                           | –                                                                                                                                                                     |
| <i>PAPOLG</i>   | Encodes a member of the Poly(A) polymerase family which mediate the post-transcriptional addition of poly(A) tail to the 3' end of mRNA precursors and several small RNAs.                                                                                 | Unknown                                                                                                                                                                                                                                                                                | –                                                                                                                                                                                  | –                                                                                                                                                                                                                                                                                                                         | –                                                                                                                                                                           | –                                                                                                                                                                     |
| <i>REL</i>      | Encodes c-Rel protein which is a proto-oncogene and a member of the NF-κB family of transcription factors . It acts as a crucial regulator of B and T cell function (22207895).                                                                            | c-Rel is known for its neuroprotective and anti-apoptotic role in NF-κB pathway (26042083, 19094066) and is required for hippocampal long-term synaptic plasticity and memory formation (24854662).                                                                                    | –                                                                                                                                                                                  | Abnormal immune-system morphology including decreased level of B-cells/T-cells, abnormal levels of IgG/IgM/IgE/macrophages and cytokine secretion; abnormal DNA replication and cell cycle; increased neuron apoptosis; abnormal skeleton morphology premature death ( 26042083).                                         | –                                                                                                                                                                           | –                                                                                                                                                                     |
| <i>PUS10</i>    | Encodes a pseudouridylylase synthase which catalyzes the isomerization of uridine to pseudouridine of RNAs (23743107). Also, act as RNA chaperones, assisting with proper tRNA folding and assembly ( 16920741, 23743107).                                 | Unknown                                                                                                                                                                                                                                                                                | –                                                                                                                                                                                  | –                                                                                                                                                                                                                                                                                                                         | –                                                                                                                                                                           | –                                                                                                                                                                     |
| <i>PEX13</i>    | Encodes a peroxisomal membrane protein which has an important role in peroxisomal biogenesis (23716570).                                                                                                                                                   | –                                                                                                                                                                                                                                                                                      | 10 [Zellweger syndrome, autosomal recessive (21031596; 25525159; 10332040; 17041890; 23716570; 19449432; 11405337); Neonatal adrenoleukodystrophy, autosomal recessive (10332040)] | abnormal/thin cerebellum and cerebral cortex development, postnatal growth retardation and decreased body weight , hypotonia, impaired coordination, impaired reflex and limb grasping , neuronal abnormalities including astrocytosis, gliosis, and neuron degeneration, premature death and complete neonatal lethality | No major phenotypic abnormalities due to ineffective knockdown (20556416)                                                                                                   | –                                                                                                                                                                     |
| <i>KIAA1841</i> | Encodes an uncharacterized protein KIAA1841                                                                                                                                                                                                                | Unknown                                                                                                                                                                                                                                                                                | –                                                                                                                                                                                  | –                                                                                                                                                                                                                                                                                                                         | –                                                                                                                                                                           | –                                                                                                                                                                     |
| <i>C2orf74</i>  | Encodes an uncharacterized protein, chromosome 2 open reading frame 74.                                                                                                                                                                                    | Unknown                                                                                                                                                                                                                                                                                | –                                                                                                                                                                                  | –                                                                                                                                                                                                                                                                                                                         | No orthologue                                                                                                                                                               | –                                                                                                                                                                     |
| <i>AHSA2</i>    | Encodes a protein acting as a co-chaperone of heat shock protein 90 (Hsp90) and is associated with ATPase activator activity.                                                                                                                              | Unknown                                                                                                                                                                                                                                                                                | –                                                                                                                                                                                  | decreased total retina thickness                                                                                                                                                                                                                                                                                          | No orthologue                                                                                                                                                               | –                                                                                                                                                                     |

|                |                                                                                                                                                                                                                                                                                                                                                                                                                                                    |                                                                                                                                                                                                                                                                                                                                                                                                                                                                                                                                                                |                                                                                                                                                        |                                                                                                                                                                                                                                                     |   |                                                                                                                                                                                       |
|----------------|----------------------------------------------------------------------------------------------------------------------------------------------------------------------------------------------------------------------------------------------------------------------------------------------------------------------------------------------------------------------------------------------------------------------------------------------------|----------------------------------------------------------------------------------------------------------------------------------------------------------------------------------------------------------------------------------------------------------------------------------------------------------------------------------------------------------------------------------------------------------------------------------------------------------------------------------------------------------------------------------------------------------------|--------------------------------------------------------------------------------------------------------------------------------------------------------|-----------------------------------------------------------------------------------------------------------------------------------------------------------------------------------------------------------------------------------------------------|---|---------------------------------------------------------------------------------------------------------------------------------------------------------------------------------------|
| <b>USP34</b>   | Encodes a deubiquitinating enzyme which acts as the regulator of axin stability and Wnt/beta-catenin signaling pathway (21383061) as well as the negative regulator of NF-kB pathway (23590831, 25027767). It also functions as promoter of genome stability by regulating ubiquitin signaling at DNA double-strand breaks (23863847).                                                                                                             | Unknown                                                                                                                                                                                                                                                                                                                                                                                                                                                                                                                                                        | 1 [Congenital heart disease (23665959)]                                                                                                                | Early lethality in mice (prior to 4 weeks of age). Surviving mice grew poorly and exhibited numerous neurological abnormalities (26273529).                                                                                                         | - | Drosophila: knock down results in early lethality (22937016).                                                                                                                         |
| <b>XPO1</b>    | Encodes an exportin protein (XPO1/CRM1) that mediates export of ~200 leucine-rich nuclear export signal (NES)-bearing proteins and of RNAs from nucleus to cytoplasm (9384386). It is also involved in mitotic microtubule spindle (kinetochore) regulation and assembly (26196321; 25982429).                                                                                                                                                     | Nucleocytoplasmic shuttling mediated by XPO1 is reported for molecules relevant for synaptogenesis (23383123) and neuronal positioning in brain (17062576). These proteins normally function in cytoplasm.                                                                                                                                                                                                                                                                                                                                                     | -                                                                                                                                                      | -                                                                                                                                                                                                                                                   | - | Drosophila: knockdown results in nuclear accumulation of expanded polyglutamine (polyQ) protein aggregates leading to neural cell toxicity and neurodegenerative diseases (21300695). |
| <b>FAM161A</b> | Encodes a protein with restricted activity to mature photoreceptors in the retina.                                                                                                                                                                                                                                                                                                                                                                 | Unknown                                                                                                                                                                                                                                                                                                                                                                                                                                                                                                                                                        | 11 [Retinitis pigmentosa, autosomal recessive (20705278, 25097241, 22581970, 20705279); Retinal dystrophy (23167750); Retinal degeneration (26352687)] | abnormal vision/retinal photoreceptor morphology and their degeneration; microgliosis; abnormal cilium morphology (24833722)                                                                                                                        | - | -                                                                                                                                                                                     |
| <b>CCT4</b>    | Encodes a molecular chaperone which facilitates proper folding of proteins upon ATP hydrolysis e.g. actin and tubulin (23612981, 10604479).                                                                                                                                                                                                                                                                                                        | -                                                                                                                                                                                                                                                                                                                                                                                                                                                                                                                                                              | -                                                                                                                                                      | -                                                                                                                                                                                                                                                   | - | Rat: Mutation in Cct4 is associated with recessive hereditary sensory neuropathy (12874111; 25124038) and cutaneous nerve degeneration (15193290)                                     |
| <b>COMMD1</b>  | Encodes a regulator of copper homeostasis, sodium uptake, and NF-kB signaling (24080195). It acts as the negative regulator of NF-kB activity by promoting ubiquitination and the subsequent proteasomal degradation of NF-kB role-player, RELA (15799966, 20048074). Diseases associated with COMMD1 include Wilson disease and copper toxicosis (autosomal recessive disorders) characterized by accumulation of copper in the liver (22216203). | Change in the expression of COMMD1 affects brain metal-ion homeostasis by influencing intracellular zinc concentrations due to abnormal copper levels. This is believed to affect autism-associated pathways at excitatory synapses (25007851). COMMD1 is also known as a regulator of misfolded protein aggregation involved in neurodegenerative disorders e.g. Amyotrophic Lateral Sclerosis (ALS) and Parkinson's (24691167). Heterozygous deletion of COMMD1 has no phenotype, but homozygous deletion associated with high functioning autism (21658582) | 1 [Elevated urinary copper (20550661)]                                                                                                                 | abnormal brain development, embryonic growth retardation and decreased size, abnormal embryo turning, abnormal allantois morphology, abnormal placenta vasculature, complete prenatal lethality (17371845), increased liver copper level (22216203) | - | Dog: Increased liver copper level and hepatitis (25053573; 22879914)                                                                                                                  |

HGMD: The Human Gene Mutation Database - a catalogue of human gene mutation studies with their reported phenotypic features (Accessed at: <http://www.hgmd.cf.ac.uk/ac/index.php>)

MGI: Mouse Genome informatics database - a catalogue of mouse gene knockout studies with their reported phenotypic features (Accessed at: <http://www.informatics.jax.org/>)

\*These genes were not deleted in >50% of cases but included here as we included in our candidate list due to their isolated involvement in two CNVs/cases

**Supplemental Table 6** – Positive VISTA enhancer elements in the 2p15p16.1 deletion region.

| <b>Chromosome Position</b>    | <b>element #</b> | <b>Expression Pattern Location [observed embryos/total embryos]</b>                    |
|-------------------------------|------------------|----------------------------------------------------------------------------------------|
| <b>chr2:58748340-58750140</b> | 1174             | <b>dorsal root ganglion[6/6]</b>                                                       |
| chr2:58799729-58800607        | 1071             | ear[4/10]                                                                              |
| chr2:58859997-58861674        | 1152             | limb[4/5]                                                                              |
| <b>chr2:58975738-58977115</b> | 1067             | <b>dorsal root ganglion[3/7], limb[5/7]</b>                                            |
| chr2:59102071-59103380        | 1199             | other[3/6]                                                                             |
| chr2:59178992-59180242        | 1181             | heart[3/8]                                                                             |
| chr2:59198905-59200529        | 393              | eye[6/12]                                                                              |
| <b>chr2:59304974-59306893</b> | 975              | <b>midbrain (mesencephalon)[4/7]</b>                                                   |
| <b>chr2:59476604-59477955</b> | 1119             | <b>neural tube[6/6], hindbrain (rhombencephalon)[5/6]</b>                              |
| <b>chr2:59540640-59541937</b> | 836              | <b>facial mesenchyme[5/12]</b>                                                         |
| <b>chr2:59746377-59746992</b> | 394              | <b>midbrain (mesencephalon)[4/11]</b>                                                  |
| <b>chr2:60352514-60353602</b> | 779              | <b>midbrain (mesencephalon)[8/9], forebrain[5/9]</b>                                   |
| <b>chr2:60441495-60442515</b> | 399              | <b>forebrain[5/7]</b>                                                                  |
| <b>chr2:60498057-60502013</b> | 1535             | <b>hindbrain (rhombencephalon)[4/5]</b>                                                |
| <b>chr2:60761404-60763073</b> | 957              | <b>forebrain[4/4]</b>                                                                  |
| <b>chr2:60855056-60856888</b> | 1142             | <b>hindbrain (rhombencephalon)[3/3]</b>                                                |
| <b>chr2:63193855-63194929</b> | 690              | <b>midbrain (mesencephalon)[7/11]</b>                                                  |
| <b>chr2:63275695-63277103</b> | 1066             | <b>hindbrain (rhombencephalon)[5/5], midbrain (mesencephalon)[5/5], forebrain[5/5]</b> |
| chr2:66297527-66299214        | 205              | genital tubercle[8/9]                                                                  |

**Bold:** Brain/neural-expressed enhancers

This table contains the 19 positive enhancer elements found in the 2p15p16.1 region and includes their chromosomal position (chr:start-stop), element number, and observed expression pattern location in mouse embryos. The elements are listed in order of their position in the 2p15p16.1 deletion region from distal (telomeric) to proximal (centromeric).

**Supplemental Table 7** – Enriched pathways for the 16 most commonly deleted genes in the 2p15p16.1 microdeletion region.

| Pathway Name                                      | #Gene | EntrezGene       | Statistics                                         |
|---------------------------------------------------|-------|------------------|----------------------------------------------------|
| Canonical NF-kappaB pathway                       | 2     | <i>XPO1, REL</i> | C=35;O=2;E=0.01;R=164.29;rawP=6.67e-05;adjP=0.0020 |
| Endogenous TLR signaling                          | 2     | <i>XPO1, REL</i> | C=57;O=2;E=0.02;R=100.88;rawP=0.0002;adjP=0.0020   |
| CD40/CD40L signaling                              | 2     | <i>XPO1, REL</i> | C=58;O=2;E=0.02;R=99.14;rawP=0.0002;adjP=0.0020    |
| IL23-mediated signaling events                    | 2     | <i>XPO1, REL</i> | C=66;O=2;E=0.02;R=87.13;rawP=0.0002;adjP=0.0020    |
| Aurora A signaling                                | 2     | <i>XPO1, REL</i> | C=64;O=2;E=0.02;R=89.85;rawP=0.0002;adjP=0.0020    |
| IL2 signaling events mediated by PI3K             | 2     | <i>XPO1, REL</i> | C=67;O=2;E=0.02;R=85.82;rawP=0.0002;adjP=0.0020    |
| Signaling events regulated by Ret tyrosine kinase | 2     | <i>XPO1, REL</i> | C=69;O=2;E=0.02;R=83.34;rawP=0.0003;adjP=0.0026    |
| IL12-mediated signaling events                    | 2     | <i>XPO1, REL</i> | C=113;O=2;E=0.04;R=50.89;rawP=0.0007;adjP=0.0033   |
| IL2-mediated signaling events                     | 2     | <i>XPO1, REL</i> | C=115;O=2;E=0.04;R=50.00;rawP=0.0007;adjP=0.0033   |
| LPA receptor mediated events                      | 2     | <i>XPO1, REL</i> | C=100;O=2;E=0.03;R=57.50;rawP=0.0005;adjP=0.0033   |

15/16 genes were recognized by Webgestalt. This table lists the top 10 pathways for the WebGestalt pathway commons enrichment analysis. The first column lists the pathway, the second and third columns indicate the number and gene identification for the genes involved, and the last row contains the statistics from the enrichment analysis: number of reference genes in the category (C), number of genes in the gene set and also in the category (O), expected number in the category (E), Ratio of enrichment (R), p value from hypergeometric test (rawP), and p value adjusted by the multiple test adjustment (adjP).

**Supplemental Table 8** – Sequence of morpholinos used to knockdown the genes of interest in zebrafish.

| Human gene    | Zebrafish orthologue (Zv9) | Type of MO : (Sequence (5'→ 3')) | Target site                   |
|---------------|----------------------------|----------------------------------|-------------------------------|
| <i>XPO1</i>   | <i>xpo1a</i>               | SB: (TCAGAAACTGTGGAAGAAGCCAGAA)  | i8-e9 boundary                |
|               | <i>xpo1b</i>               | SB: (AAAATGATCTTACTTACCTGTGGCC)  | e1-i1 boundary                |
| <i>USP34</i>  | <i>usp34</i>               | SB: (GCCTTAATGAGTGCTACTGACCTCT)  | e2-i2 boundary                |
| <i>REL</i>    | <i>rel</i>                 | SB: (AAAGATTGAACTTACGCAATGGCCC)  | e4-i4 boundary (did not work) |
|               | <i>rel</i>                 | SB: (GTATAAATACTCGTACTCACCATCC)  | e1-i1 boundary (did not work) |
|               | <i>rel</i>                 | TB: (TTGAGAGGGATTGCACATCCATAAC)  | translation initiation site   |
| <i>BCL11A</i> | <i>bcl11aa</i>             | SB: (TGTCTTTACTTACGCGAAAAATCCC)  | e1-i1 boundary                |
|               | <i>bcl11ab</i>             | SB: (AGAACTTTCCGGTAACTTACGCGAA)  | e1-i1 boundary                |
| <i>VRK2</i>   | <i>vrk2</i>                | SB: (AAGTCAATCTCATACTTGTTCGGT)   | e4-i4 boundary                |
| <i>FANCL</i>  | <i>fancl</i>               | SB: (CCACTTGATTTATTGTACCTGCTTC)  | e3-i3 boundary                |
|               | MM-control                 | SB: (TCACAAACTCTCGAACAACCCAGAA)  | No binding site               |
|               | <i>p53</i>                 | TB: (GCGCCATTGCTTTGCAAGAATTG)    | translation initiation site   |

*Abbreviations:* MO = morpholino; SB = Splice-blocking; TB = Translation-blocking; i: intron; e: exon; MM = gene mismatch

**Supplemental Table 9** – Sequence of PCR primers used to confirm the knockdown of the genes of interest in zebrafish.

| Zebrafish gene            | Forward primer (Sequence (5'→ 3')) | Reverse primer (Sequence (5'→ 3')) | Primer binding site | Annealing temperature |
|---------------------------|------------------------------------|------------------------------------|---------------------|-----------------------|
| <i>xpo1a</i>              | CAGAATGCCCTCTGGTTCA                | TAGCAGCATGTAGTGCAGGG               | F: e8, R: e11       | 57.0 °C               |
| <i>xpo1b</i>              | GACAATGTTAGCCGACCACG               | TGCGACTTGCACCCACAATA               | F: e1, R: e6        | 56.0 °C               |
| <i>rel*</i>               | -                                  | -                                  | -                   | -                     |
| <i>usp34</i>              | ATGTGTGAGAACTGCGCCGA               | AAAGCAGCGTAGACCCGTTT               | F: e1, R: e3        | 52.9 °C               |
| <i>bcl11aa</i>            | ATCTTCCCTGCGCCATCTTT               | GCCATTGCACTGCTTCCTTT               | F: 5' UTR, R: e2    | 55.0 °C               |
| <i>bcl11ab</i>            | CCATGAAGCCCAACACAAGC               | ATGTCGGCCAAAGGAAACCT               | F: 5' UTR, R: e2    | 53.5 °C               |
| <i>vrk2</i>               | GTCCCTGTTGAGATGATGCT               | GTACACCCAATTGTAGCACGC              | F: e2, R: e5        | 57.0 °C               |
| <i>fancl</i>              | TGAGCTGCTTGCTGATGAGA               | ACTGACATCCTGGTTGGCTC               | F: e1, R: e5        | 53.0 °C               |
| <i>Actb2 (b-actin2)**</i> | GCAGAAGGAGATCACATCCCTGGC           | CATTGCCGTCACCTTCACCGTTC            | F: e4, R: e5        | 52.0 °C               |

*Abbreviations:* e = exon; i = intron; F = Forward; R = Reverse; UTR = Untranslated region

\**rel* knockdown was not successful with two independently designed splice-blocking morpholinos, therefore translation-blocking morpholino was used and knockdown was confirmed with western-blotting.

\*\*primer sequences for *Actb2* were obtained from Casadei et al., (2011) (PMID: 21281742) and were used as the housekeeping gene control
